# Supplementary material for: Synthesis and symmetry of perovskite oxynitride CaW(O,N)3
Source: Royal Society of Chemistry journal article supplement (doi:10.1039/d4mh00317a), 2024-01-01

## checkCIF/PLATON report

Bond distances and angles from GSAS-II had incorrect unit cell offsets prior to GSAS-II version 4876. The GSAS-II authors recommend updating. If a CIF file from the most recent GSAS-II version is still showing problems, you are encouraged to contact the software authors.

You have not supplied any structure factors. As a result the full set of tests cannot be run.

THIS REPORT IS FOR GUIDANCE ONLY. IF USED AS PART OF A REVIEW PROCEDURE FOR PUBLICATION, IT SHOULD NOT REPLACE THE EXPERTISE OF AN EXPERIENCED CRYSTALLOGRAPHIC REFEREE.

No syntax errors found.      CIF dictionary      Interpreting this report

### Datablock: CaWO<sub>3</sub>N<sub>3</sub>\_phase\_0

---

|                        |                  |                    |                |
|------------------------|------------------|--------------------|----------------|
| Bond precision:        | = 0.0000 A       | Wavelength=0.71073 |                |
| Cell:                  | a=5.57079 (11)   | b=7.85971 (17)     | c=5.53262 (10) |
|                        | alpha=90         | beta=90            | gamma=90       |
| Temperature:           | 298 K            |                    |                |
|                        | Calculated       | Reported           |                |
| Volume                 | 242.245 (8)      | 242.245 (5)        |                |
| Space group            | P n m a          | P n m a            |                |
| Hall group             | -P 2ac 2n        | -P 2ac 2n          |                |
| Moiety formula         | N3 O3 W2, 2 (Ca) | ?                  |                |
| Sum formula            | Ca2 N3 O3 W2     | Ca N1.5 O1.5 W     |                |
| Mr                     | 537.87           | 268.94             |                |
| Dx, g cm <sup>-3</sup> | 7.374            | 7.374              |                |
| Z                      | 2                | 4                  |                |
| Mu (mm <sup>-1</sup> ) | 49.484           | 0.000              |                |
| F000                   | 466.0            | 0.0                |                |
| F000'                  | 464.27           |                    |                |
| h, k, lmax             |                  |                    |                |
| Nref                   |                  |                    |                |
| Tmin, Tmax             |                  |                    |                |
| Tmin'                  |                  |                    |                |

Correction method= Not given

Data completeness=

Theta (max) =

R(reflections)=

wR2(reflections)=

S =

Npar=

---

The following ALERTS were generated. Each ALERT has the format

**test-name\_ALERT\_alert-type\_alert-level.**

Click on the hyperlinks for more details of the test.

---

 **Alert level A**

|                   |       |      |            |       |            |       |        |         |
|-------------------|-------|------|------------|-------|------------|-------|--------|---------|
| PLAT702_ALERT_1_A | Angle | Calc | 117.15(5), | Rep   | 86.22(11), | Dev.. | 618.60 | Sigma   |
|                   | O1    | -CA1 | -O1        | 1_555 | 1_555      | 6_666 | #      | 1 Check |

**Author Response: Reported angles are correct. Calculated angles appear to be erroneous.**

|                   |       |      |             |       |            |       |      |         |
|-------------------|-------|------|-------------|-------|------------|-------|------|---------|
| PLAT702_ALERT_1_A | Angle | Calc | 126.38(10), | Rep   | 125.43(7), | Dev.. | 9.50 | Sigma   |
|                   | O1    | -CA1 | -O2         | 6_666 | 1_555      | 1_555 | #    | 3 Check |

**Author Response: Reported angles are correct. Calculated angles appear to be erroneous.**

|                   |       |      |           |       |            |       |         |         |
|-------------------|-------|------|-----------|-------|------------|-------|---------|---------|
| PLAT702_ALERT_1_A | Angle | Calc | 72.58(5), | Rep   | 125.43(7), | Dev.. | 1057.00 | Sigma   |
|                   | O1    | -CA1 | -O2       | 6_666 | 1_555      | 3_555 | #       | 5 Check |

**Author Response: Reported angles are correct. Calculated angles appear to be erroneous.**

|                   |       |      |            |       |           |       |        |         |
|-------------------|-------|------|------------|-------|-----------|-------|--------|---------|
| PLAT702_ALERT_1_A | Angle | Calc | 115.38(6), | Rep   | 63.28(6), | Dev.. | 868.33 | Sigma   |
|                   | O1    | -CA1 | -O2        | 6_666 | 1_555     | 5_656 | #      | 8 Check |

**Author Response: Reported angles are correct. Calculated angles appear to be erroneous.**

|                   |       |      |           |       |           |       |        |          |
|-------------------|-------|------|-----------|-------|-----------|-------|--------|----------|
| PLAT702_ALERT_1_A | Angle | Calc | 83.76(2), | Rep   | 66.00(8), | Dev.. | 888.00 | Sigma    |
|                   | O1    | -CA1 | -O2       | 1_555 | 1_555     | 7_666 | #      | 11 Check |

**Author Response: Reported angles are correct. Calculated angles appear to be erroneous.**

|                   |       |      |           |       |           |       |         |          |
|-------------------|-------|------|-----------|-------|-----------|-------|---------|----------|
| PLAT702_ALERT_1_A | Angle | Calc | 49.97(1), | Rep   | 63.28(6), | Dev.. | 1331.00 | Sigma    |
|                   | O1    | -CA1 | -O2       | 6_666 | 1_555     | 7_666 | #       | 12 Check |

**Author Response: Reported angles are correct. Calculated angles appear to be erroneous.**

|                   |       |      |            |       |            |       |        |          |
|-------------------|-------|------|------------|-------|------------|-------|--------|----------|
| PLAT702_ALERT_1_A | Angle | Calc | 144.14(7), | Rep   | 170.48(9), | Dev.. | 376.29 | Sigma    |
|                   | O2    | -CA1 | -O2        | 1_555 | 1_555      | 7_666 | #      | 13 Check |

**Author Response: Reported angles are correct. Calculated angles appear to be erroneous.**

PLAT702\_ALERT\_1\_A Angle Calc 53.83(4), Rep 80.70(3), Dev.. 671.83 Sigma  
O2 -CA1 -O2 3\_555 1\_555 7\_666 # 14 Check

**Author Response: Reported angles are correct. Calculated angles appear to be erroneous.**

PLAT702\_ALERT\_1\_A Angle Calc 135.01(8), Rep 108.07(11), Dev.. 336.75 Sigma  
O2 -CA1 -O2 5\_656 1\_555 7\_666 # 15 Check

**Author Response: Reported angles are correct. Calculated angles appear to be erroneous.**

PLAT702\_ALERT\_1\_A Angle Calc 84.90(4), Rep 90.18(6), Dev.. 132.00 Sigma  
O1 -W1 -O2 1\_555 1\_555 8\_656 # 26 Check

**Author Response: Reported angles are correct. Calculated angles appear to be erroneous.**

PLAT702\_ALERT\_1\_A Angle Calc 95.10(4), Rep 89.82(6), Dev.. 132.00 Sigma  
O1 -W1 -O2 5\_655 1\_555 8\_656 # 27 Check

**Author Response: Reported angles are correct. Calculated angles appear to be erroneous.**

PLAT702\_ALERT\_1\_A Angle Calc 57.06(3), Rep 101.06(11), Dev.. 1466.67 Sigma  
CA1 -O1 -CA1 1\_555 1\_555 6\_566 # 31 Check

**Author Response: Reported angles are correct. Calculated angles appear to be erroneous.**

PLAT702\_ALERT\_1\_A Angle Calc 149.73(5), Rep 90.45(5), Dev.. 1185.60 Sigma  
CA1 -O1 -W1 6\_566 1\_555 1\_555 # 33 Check

**Author Response: Reported angles are correct. Calculated angles appear to be erroneous.**

PLAT702\_ALERT\_1\_A Angle Calc 45.02(3), Rep 90.45(5), Dev.. 1514.33 Sigma  
CA1 -O1 -W1 6\_566 1\_555 3\_555 # 35 Check

**Author Response: Reported angles are correct. Calculated angles appear to be erroneous.**

PLAT702\_ALERT\_1\_A Angle Calc 57.06(3), Rep 101.06(9), Dev.. 1466.67 Sigma  
CA1 -N1 -CA1 1\_555 1\_555 6\_566 # 43 Check

**Author Response: Reported angles are correct. Calculated angles appear to be erroneous.**

PLAT702\_ALERT\_1\_A Angle Calc 149.73(5), Rep 90.45(1), Dev.. 1185.66 Sigma  
CA1 -N1 -W1 6\_566 1\_555 1\_555 # 45 Check

**Author Response: Reported angles are correct. Calculated angles appear to be erroneous.**

PLAT702\_ALERT\_1\_A Angle Calc 45.02(3), Rep 90.45(1), Dev... 1514.23 Sigma  
CA1 -N1 -W1 6\_566 1\_555 3\_555 # 47 Check

**Author Response: Reported angles are correct. Calculated angles appear to be erroneous.**

PLAT722\_ALERT\_1\_A Angle Calc 156.14(2), Rep 89.59 Dev... 66.55 Degree  
O2 -W1 -O2 1\_554 1\_555 8\_656 # 28 Check

**Author Response: Reported angles are correct. Calculated angles appear to be erroneous.**

PLAT722\_ALERT\_1\_A Angle Calc 112.79(3), Rep 180.00 Dev... 67.21 Degree  
O2 -W1 -O2 4\_554 1\_555 8\_656 # 29 Check

**Author Response: Reported angles are correct. Calculated angles appear to be erroneous.**

PLAT722\_ALERT\_1\_A Angle Calc 23.86(2), Rep 90.41 Dev... 66.55 Degree  
O2 -W1 -O2 5\_656 1\_555 8\_656 # 30 Check

**Author Response: Reported angles are correct. Calculated angles appear to be erroneous.**

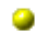

**Alert level C**

PLAT041\_ALERT\_1\_C Calc. and Reported SumFormula Strings Differ Please Check  
Calc.: Ca N1.50 O1.50 W  
Rep.: Ca N1.5 O1.5 W

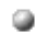

**Alert level G**

PLAT004\_ALERT\_5\_G Polymeric Structure Found with Maximum Dimension 3 Info  
PLAT045\_ALERT\_1\_G Calculated and Reported Z Differ by a Factor ... 0.500 Check  
PLAT152\_ALERT\_1\_G The Supplied and Calc. Volume s.u. Differ by ... 3 Units  
PLAT301\_ALERT\_3\_G Main Residue Disorder .....(Resd 1) 75% Note  
PLAT769\_ALERT\_4\_G CIF Embedded Explicitly Supplied Scattering Data Please Note  
PLAT811\_ALERT\_5\_G No ADDSYM Analysis: Too Many Excluded Atoms .... ! Info  
PLAT981\_ALERT\_1\_G No non-zero f" Anomalous Scattering Values Found Please Check  
PLAT986\_ALERT\_1\_G No non-zero f' Anomalous Scattering Values Found Please Check

- 
- 20 **ALERT level A** = Most likely a serious problem - resolve or explain  
0 **ALERT level B** = A potentially serious problem, consider carefully  
1 **ALERT level C** = Check. Ensure it is not caused by an omission or oversight  
8 **ALERT level G** = General information/check it is not something unexpected
- 25 ALERT type 1 CIF construction/syntax error, inconsistent or missing data  
0 ALERT type 2 Indicator that the structure model may be wrong or deficient  
1 ALERT type 3 Indicator that the structure quality may be low  
1 ALERT type 4 Improvement, methodology, query or suggestion  
2 ALERT type 5 Informative message, check
-

## Datablock: CaWO<sub>3</sub>\_phase\_1

---

Bond precision: W- O = 0.0003 Å                      Wavelength=0.71073

Cell:                      a=5.2636 (5)                      b=5.2636 (5)                      c=11.3536 (18)  
                                                alpha=90                      beta=90                      gamma=90

Temperature:                      298 K

|                                     | Calculated                                    | Reported            |
|-------------------------------------|-----------------------------------------------|---------------------|
| Volume                              | 314.56 (8)                                    | 314.55 (11)         |
| Space group                         | I 41/a                                        | I 41/a              |
| Hall group                          | -I 4ad                                        | -I 4ad              |
| Moiety formula                      | O8 W2, 2 (Ca)                                 | ?                   |
| Sum formula                         | Ca <sub>2</sub> O <sub>8</sub> W <sub>2</sub> | Ca O <sub>4</sub> W |
| Mr                                  | 575.84                                        | 287.93              |
| D <sub>x</sub> , g cm <sup>-3</sup> | 6.080                                         | 6.080               |
| Z                                   | 2                                             | 4                   |
| Mu (mm <sup>-1</sup> )              | 38.174                                        | 0.000               |
| F <sub>000</sub>                    | 504.0                                         | 0.0                 |
| F <sub>000</sub> '                  | 502.30                                        |                     |
| h, k, l <sub>max</sub>              |                                               |                     |
| N <sub>ref</sub>                    |                                               |                     |
| T <sub>min</sub> , T <sub>max</sub> |                                               |                     |
| T <sub>min</sub> '                  |                                               |                     |

Correction method= Not given

Data completeness=                      Theta (max)=

R(reflections)=                      wR<sub>2</sub>(reflections)=  
S =                      N<sub>par</sub>=

---

The following ALERTS were generated. Each ALERT has the format  
**test-name\_ALERT\_alert-type\_alert-level.**  
Click on the hyperlinks for more details of the test.

---

### Alert level A

|                         |      |                |               |                      |         |
|-------------------------|------|----------------|---------------|----------------------|---------|
| PLAT722_ALERT_1_A Angle | Calc | 44.55 (1), Rep | 114.01 Dev... | 69.46 Degree         |         |
|                         | O2   | -W1            | -O2           | 4_444 1_555 10_444 # | 2 Check |

**Author Response: Reported angles are correct. Calculated angles appear to be erroneous.**

|                   |       |      |           |       |        |        |       |         |
|-------------------|-------|------|-----------|-------|--------|--------|-------|---------|
| PLAT722_ALERT_1_A | Angle | Calc | 63.87(1), | Rep   | 107.25 | Dev... | 43.38 | Degree  |
|                   | O2    | -W1  | -O2       | 5_555 | 1_555  | 10_444 | #     | 3 Check |

**Author Response: Reported angles are correct. Calculated angles appear to be erroneous.**

|                   |       |      |            |        |        |        |       |         |
|-------------------|-------|------|------------|--------|--------|--------|-------|---------|
| PLAT722_ALERT_1_A | Angle | Calc | 134.05(1), | Rep    | 107.25 | Dev... | 26.80 | Degree  |
|                   | O2    | -W1  | -O2        | 10_444 | 1_555  | 15_545 | #     | 6 Check |

**Author Response: Reported angles are correct. Calculated angles appear to be erroneous.**

---

**Alert level C**

|                   |                                          |        |              |        |         |       |              |
|-------------------|------------------------------------------|--------|--------------|--------|---------|-------|--------------|
| PLAT042_ALERT_1_C | Calc. and Reported MoietyFormula Strings | Differ | Please Check |        |         |       |              |
|                   | Calc: O8 W2, 2(Ca)                       |        |              |        |         |       |              |
|                   | Rep.: ?'                                 |        |              |        |         |       |              |
| PLAT741_ALERT_1_C | Bond                                     | Calc   | 2.4420(4),   | Rep    | 2.44193 | ..... | Missing s.u. |
|                   | CA0                                      | -O2    | 1_555        | 1_555  | .....   | #     | 1 Check      |
| PLAT741_ALERT_1_C | Bond                                     | Calc   | 2.4728(4),   | Rep    | 2.47282 | ..... | Missing s.u. |
|                   | CA0                                      | -O2    | 1_555        | 2_445  | .....   | #     | 2 Check      |
| PLAT741_ALERT_1_C | Bond                                     | Calc   | 2.4420(4),   | Rep    | 2.44193 | ..... | Missing s.u. |
|                   | CA0                                      | -O2    | 1_555        | 6_545  | .....   | #     | 3 Check      |
| PLAT741_ALERT_1_C | Bond                                     | Calc   | 2.4728(4),   | Rep    | 2.47282 | ..... | Missing s.u. |
|                   | CA0                                      | -O2    | 1_555        | 7_455  | .....   | #     | 4 Check      |
| PLAT741_ALERT_1_C | Bond                                     | Calc   | 2.4420(4),   | Rep    | 2.44193 | ..... | Missing s.u. |
|                   | CA0                                      | -O2    | 1_555        | 11_545 | .....   | #     | 5 Check      |
| PLAT741_ALERT_1_C | Bond                                     | Calc   | 2.4728(4),   | Rep    | 2.47282 | ..... | Missing s.u. |
|                   | CA0                                      | -O2    | 1_555        | 12_555 | .....   | #     | 6 Check      |
| PLAT741_ALERT_1_C | Bond                                     | Calc   | 2.4728(4),   | Rep    | 2.47282 | ..... | Missing s.u. |
|                   | CA0                                      | -O2    | 1_555        | 13_545 | .....   | #     | 7 Check      |
| PLAT741_ALERT_1_C | Bond                                     | Calc   | 2.4420(4),   | Rep    | 2.44193 | ..... | Missing s.u. |
|                   | CA0                                      | -O2    | 1_555        | 16_445 | .....   | #     | 8 Check      |
| PLAT741_ALERT_1_C | Bond                                     | Calc   | 1.8006(3),   | Rep    | 1.80058 | ..... | Missing s.u. |
|                   | W1                                       | -O2    | 1_555        | 4_444  | .....   | #     | 9 Check      |
| PLAT741_ALERT_1_C | Bond                                     | Calc   | 1.8006(3),   | Rep    | 1.80058 | ..... | Missing s.u. |
|                   | W1                                       | -O2    | 1_555        | 5_555  | .....   | #     | 10 Check     |
| PLAT741_ALERT_1_C | Bond                                     | Calc   | 1.8006(3),   | Rep    | 1.80058 | ..... | Missing s.u. |
|                   | W1                                       | -O2    | 1_555        | 10_544 | .....   | #     | 11 Check     |
| PLAT741_ALERT_1_C | Bond                                     | Calc   | 1.8006(3),   | Rep    | 1.80058 | ..... | Missing s.u. |
|                   | W1                                       | -O2    | 1_555        | 15_545 | .....   | #     | 12 Check     |
| PLAT741_ALERT_1_C | Bond                                     | Calc   | 2.4420(4),   | Rep    | 2.44193 | ..... | Missing s.u. |
|                   | O2                                       | -CA0   | 1_555        | 1_555  | .....   | #     | 13 Check     |
| PLAT741_ALERT_1_C | Bond                                     | Calc   | 2.4728(4),   | Rep    | 2.47282 | ..... | Missing s.u. |
|                   | O2                                       | -CA0   | 1_555        | 4_544  | .....   | #     | 14 Check     |
| PLAT741_ALERT_1_C | Bond                                     | Calc   | 1.8006(3),   | Rep    | 1.80058 | ..... | Missing s.u. |
|                   | O2                                       | -W1    | 1_555        | 2_455  | .....   | #     | 15 Check     |

---

**Alert level G**

|                   |                                                  |       |       |
|-------------------|--------------------------------------------------|-------|-------|
| PLAT004_ALERT_5_G | Polymeric Structure Found with Maximum Dimension | 1     | Info  |
| PLAT045_ALERT_1_G | Calculated and Reported Z Differ by a Factor ... | 0.500 | Check |
| PLAT152_ALERT_1_G | The Supplied and Calc. Volume s.u. Differ by ... | -3    | Units |
| PLAT720_ALERT_4_G | Number of Unusual/Non-Standard Labels .....      | 1     | Note  |

CaO

|                   |                                                  |              |
|-------------------|--------------------------------------------------|--------------|
| PLAT769_ALERT_4_G | CIF Embedded Explicitly Supplied Scattering Data | Please Note  |
| PLAT794_ALERT_5_G | Tentative Bond Valency for W1 (V) .              | 5.09 Info    |
| PLAT981_ALERT_1_G | No non-zero f" Anomalous Scattering Values Found | Please Check |
| PLAT986_ALERT_1_G | No non-zero f' Anomalous Scattering Values Found | Please Check |

---

3 **ALERT level A** = Most likely a serious problem - resolve or explain  
0 **ALERT level B** = A potentially serious problem, consider carefully  
16 **ALERT level C** = Check. Ensure it is not caused by an omission or oversight  
8 **ALERT level G** = General information/check it is not something unexpected

23 ALERT type 1 CIF construction/syntax error, inconsistent or missing data  
0 ALERT type 2 Indicator that the structure model may be wrong or deficient  
0 ALERT type 3 Indicator that the structure quality may be low  
2 ALERT type 4 Improvement, methodology, query or suggestion  
2 ALERT type 5 Informative message, check

---

It is advisable to attempt to resolve as many as possible of the alerts in all categories. Often the minor alerts point to easily fixed oversights, errors and omissions in your CIF or refinement strategy, so attention to these fine details can be worthwhile. In order to resolve some of the more serious problems it may be necessary to carry out additional measurements or structure refinements. However, the purpose of your study may justify the reported deviations and the more serious of these should normally be commented upon in the discussion or experimental section of a paper or in the "special\_details" fields of the CIF. checkCIF was carefully designed to identify outliers and unusual parameters, but every test has its limitations and alerts that are not important in a particular case may appear. Conversely, the absence of alerts does not guarantee there are no aspects of the results needing attention. It is up to the individual to critically assess their own results and, if necessary, seek expert advice.

### **Publication of your CIF in IUCr journals**

A basic structural check has been run on your CIF. These basic checks will be run on all CIFs submitted for publication in IUCr journals (*Acta Crystallographica*, *Journal of Applied Crystallography*, *Journal of Synchrotron Radiation*); however, if you intend to submit to *Acta Crystallographica Section C* or *E* or *IUCrData*, you should make sure that full publication checks are run on the final version of your CIF prior to submission.

### **Publication of your CIF in other journals**

Please refer to the *Notes for Authors* of the relevant journal for any special instructions relating to CIF submission.

---

**PLATON version of 06/01/2024; check.def file version of 05/01/2024**

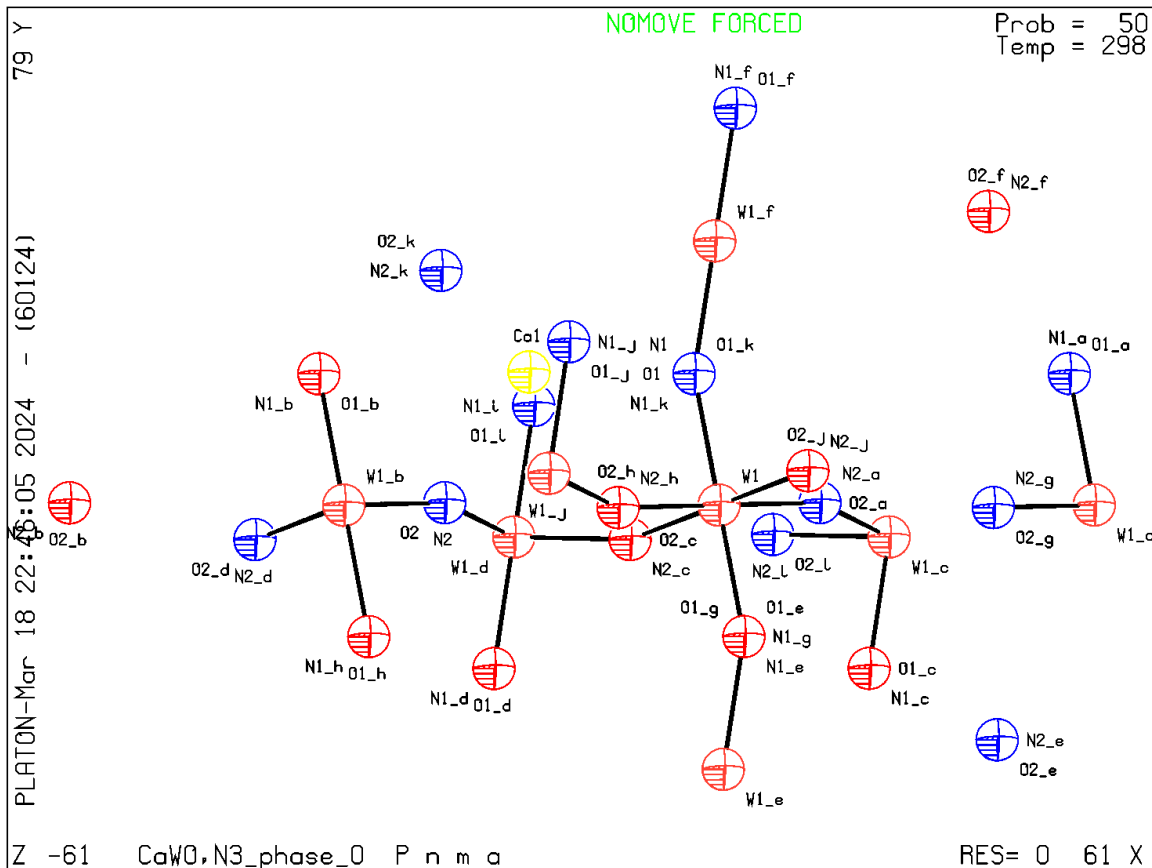



Datablock CaWO<sub>3</sub>N<sub>3</sub>\_phase\_1 - ellipsoid plot

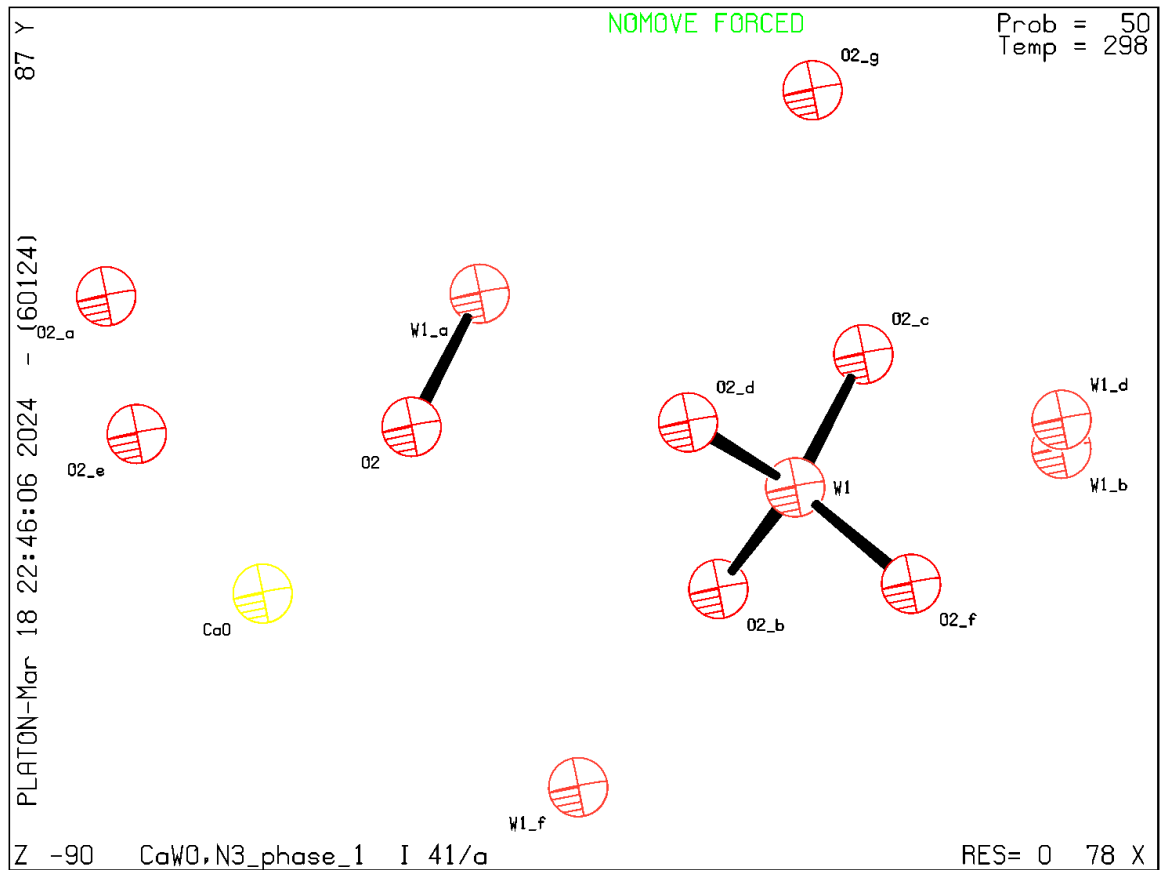

Supplement: d4mh00317a3.pdf [file d4mh00317a3.pdf]
