# Supplementary material for: Synthesis and symmetry of perovskite oxynitride CaW(O,N)3
Source: Royal Society of Chemistry journal article supplement (doi:10.1039/d4mh00317a), 2024-01-01
Supplement: d4mh00317a1.pdf [file d4mh00317a1.pdf]

Supporting Information for

## Synthesis and Symmetry of Perovskite Oxynitride $\text{CaW}(\text{O},\text{N})_3$

Matthew E Sweers<sup>1</sup>, Tzu-chen Liu<sup>1</sup>, Jiahong Shen<sup>1</sup>, Bingzhang Lu<sup>2</sup>, John W. Freeland<sup>3</sup>,  
Christopher Wolverton<sup>1</sup>, Gabriela B. Gonzalez Aviles<sup>4</sup>, Linsey C. Seitz<sup>2</sup>

<sup>1</sup> Department of Materials Science and Engineering, Northwestern University, Evanston, IL 60208, USA

<sup>2</sup> Department of Chemical and Biological Engineering, Northwestern University, Evanston, IL 60208, USA

<sup>3</sup> Advanced Photon Source, Argonne National Laboratory, Lemont, IL 60439, USA

<sup>4</sup> Department of Physics and Astrophysics, DePaul University, Chicago, IL 60614, USA

### Methods

X-ray photoelectron spectroscopy (XPS) measurements were taken using the Thermo Scientific ESCALAB 250 Xi instrument using charge compensation and a spot size of 500  $\mu\text{m}$ . All element-specific regions were scanned with a with a pass energy of 50 eV. Charge shift was done to the C-C peak at 284.8 eV and carbon signal was used to correct the oxygen composition<sup>1</sup>. Fits were made to the observed data using CasaXPS software. Mean free paths, instrument transmission functions, and Thermo Scientific values for relative scattering factor were used to convert integrated area into atomic composition estimates.

## Figures and Tables

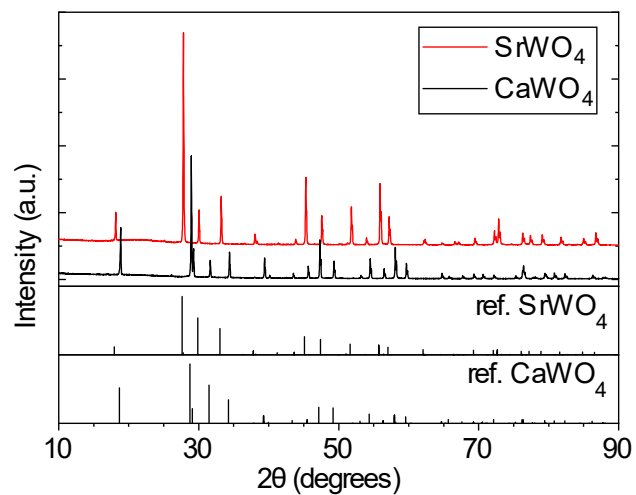

**Fig. S1:** XRD patterns for the scheelite  $\text{SrWO}_4$  and  $\text{CaWO}_4$  intermediate materials used for synthesis of  $\text{SrW(O,N)}_3$  and  $\text{CaW(O,N)}_3$  compared with reference patterns<sup>2, 3</sup>.

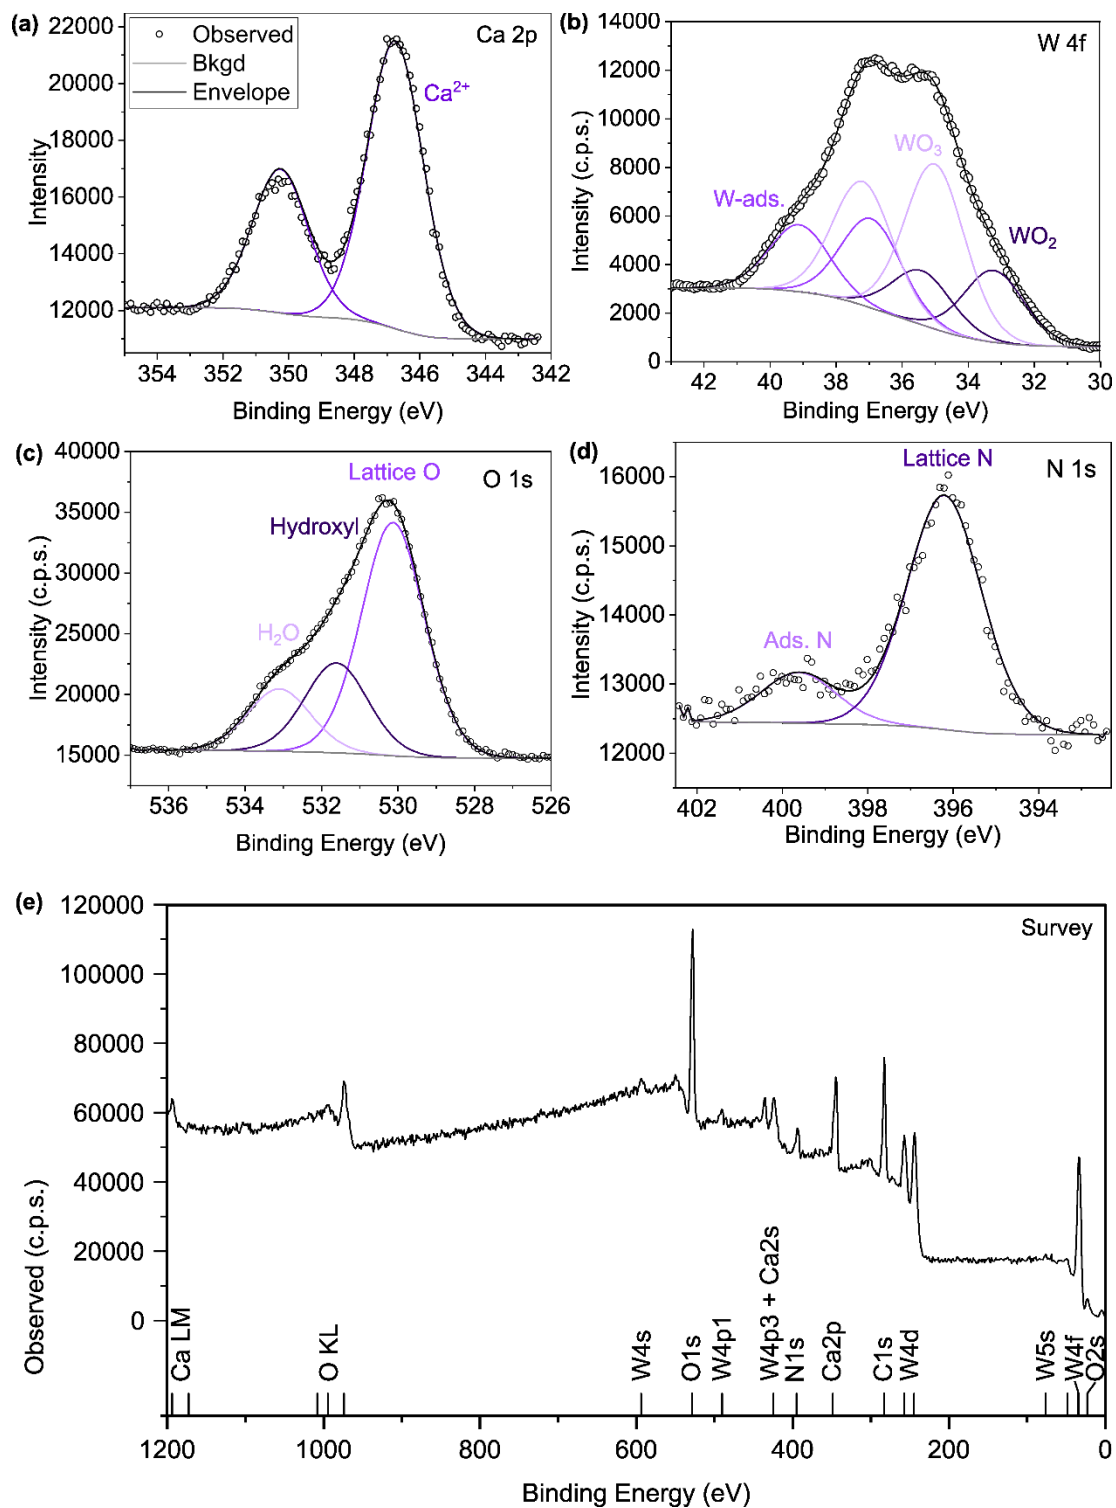

**Fig. S2:** X-ray photoelectron spectra of the (a) Ca 2p, (b) W 4f, (c) O 1s, and (d) N 1s regions. All peaks in the (e) survey scan correspond to expected elements.

**Table S1.** Surface composition of  $\text{CaW}(\text{O},\text{N})_3$  measured by XPS. Adventitious carbon signal is not included, but is used to correct for surface oxygen species. All uncertainties are approximately 10% of the reported value.

| Ca (at%) | W (at%) | O (at%) | N (At%) |
|----------|---------|---------|---------|
| 19       | 15      | 47      | 19      |

**Table S2.** Bulk anion composition reported from combustion analysis with provided uncertainty and calculated O,N stoichiometry.

|                                   | wt% N | ±    | wt% H | ±    | O range | N range |
|-----------------------------------|-------|------|-------|------|---------|---------|
| $\text{CaW}(\text{O},\text{N})_3$ | 8.35  | 0.15 | 0.13  | 0.15 | 1.4–1.7 | 1.3–1.6 |
| $\text{SrW}(\text{O},\text{N})_3$ | 7.38  | 0.15 | 0.18  | 0.15 | 1.3–1.7 | 1.3–1.7 |

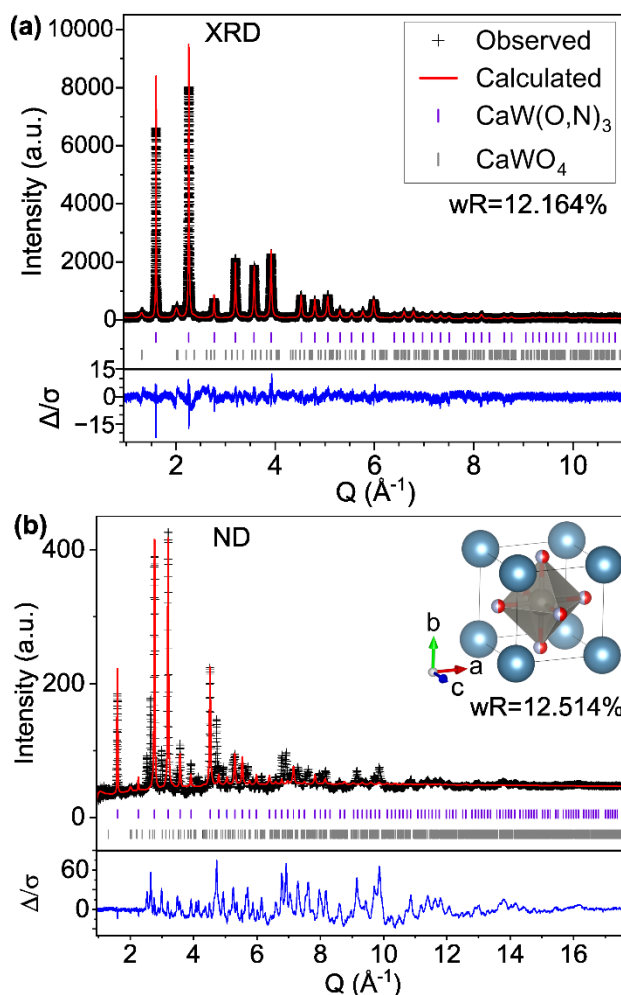

**Fig. S3.** Rietveld refinement of  $\text{CaW}(\text{O},\text{N})_3$  (a) synchrotron XRD and (b) ND patterns to structural model C-I with cubic  $Pm\bar{3}m$  symmetry predicted by the tolerance ratio provides an inadequate fit to ND.

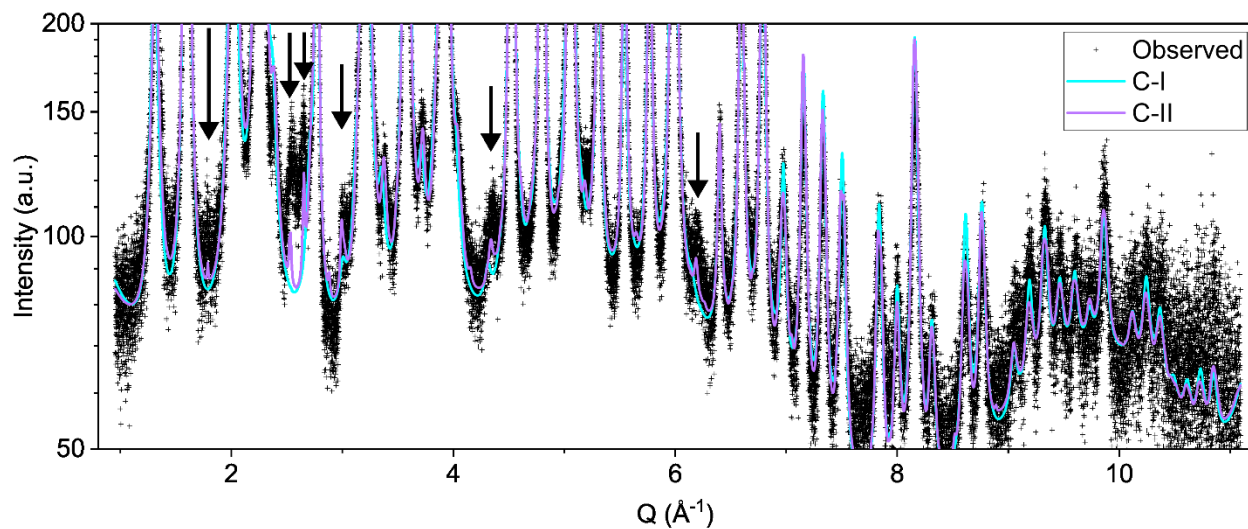

**Fig. S4.** Comparison of the fit of models C-I and C-II to the experimental XRD pattern. Several peaks, identified with arrows, are completely unmatched by the cubic C-I model and/or are fit significantly better by the orthorhombic C-II model.

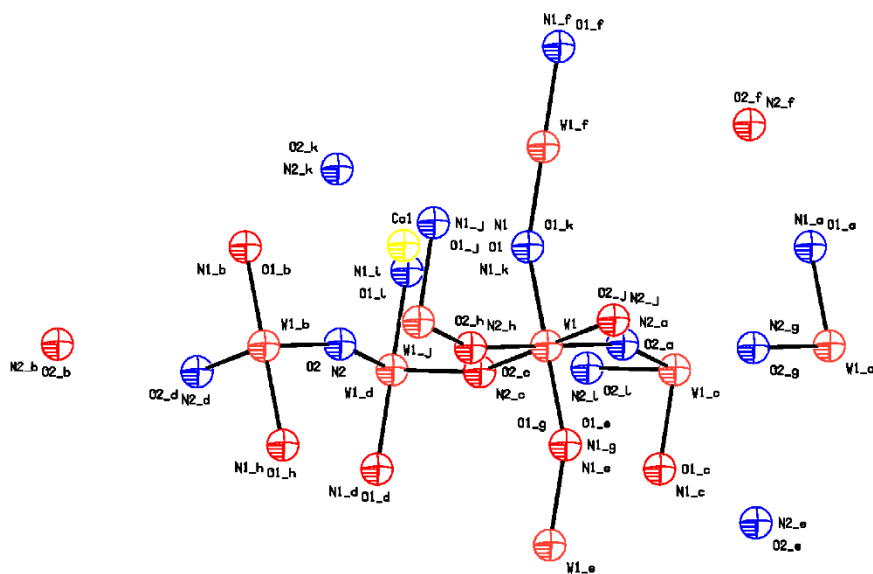

**Fig. S5.** Line drawing of  $\text{CaW}(\text{O},\text{N})_3$  model C-II with atomic positions listed in Table 2. Image generated from PLATON program.

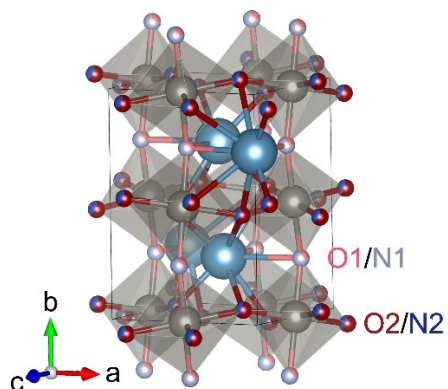

**Fig. S6.** Crystal structure schematic of model C-II with anion sites O1/N1 and O2/N2 labeled.

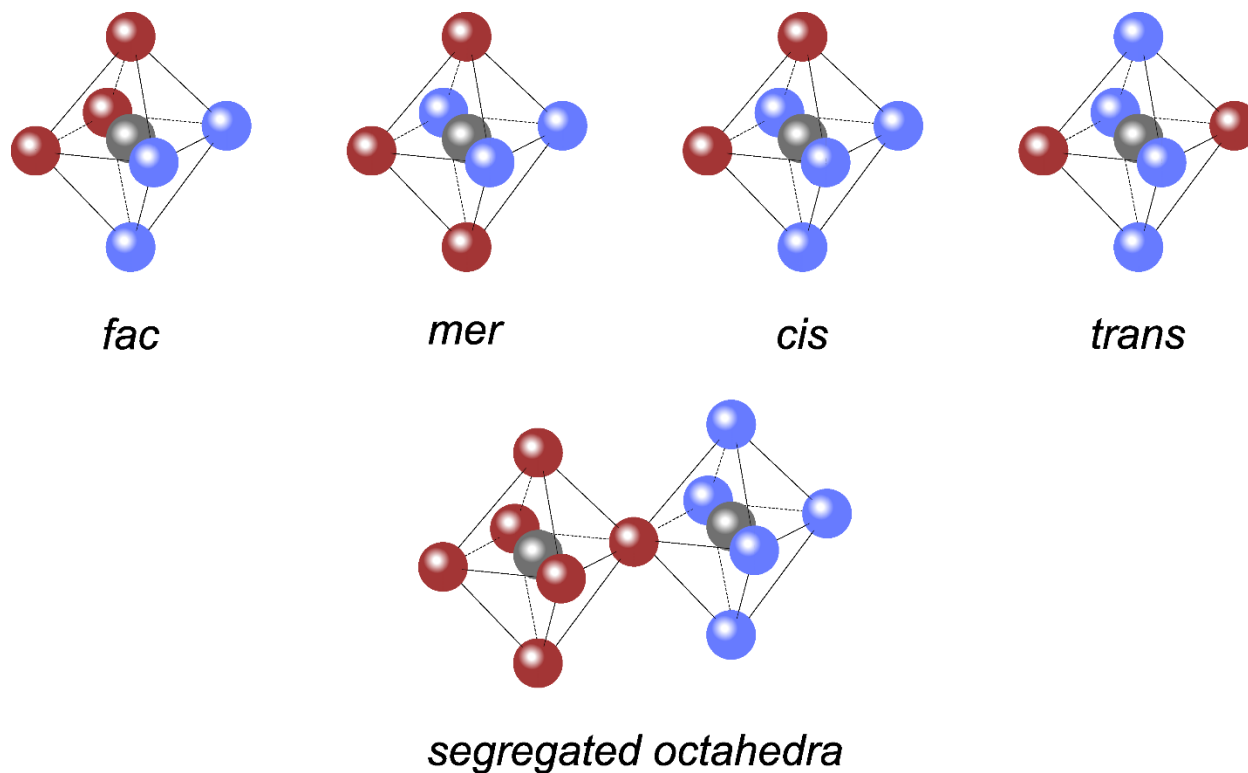

**Fig. S7.** Possible configurations of anions in  $WX_6$  octahedra labeled with their corresponding names.

**Table S3.** Comparison of weighted residuals from Rietveld refinement of orthorhombic  $Pnma$  structural model with and without fixed anion site occupancy for overall stoichiometry  $CaWO_{1.5}N_{1.5}$ .

| Model | Anion site occupancy | Overall wR (%) | XRD wR (%) | ND wR (%) |
|-------|----------------------|----------------|------------|-----------|
| C-II  | allowed to vary      | 5.029          | 9.536      | 2.781     |
| C-III | fixed @ 0.5          | 5.041          | 9.528      | 2.817     |

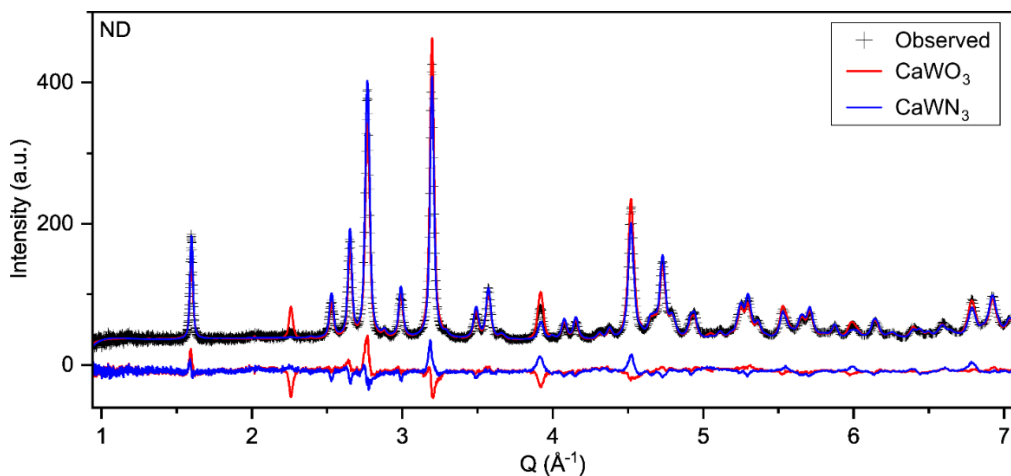

**Fig. S8.** Overlaid Rietveld refinements of  $\text{CaW}(\text{O},\text{N})_3$  ND pattern using all-O and all-N models (C-VI and C-VII, respectively). Plotted residuals identify where each composition mismatches the observed data.

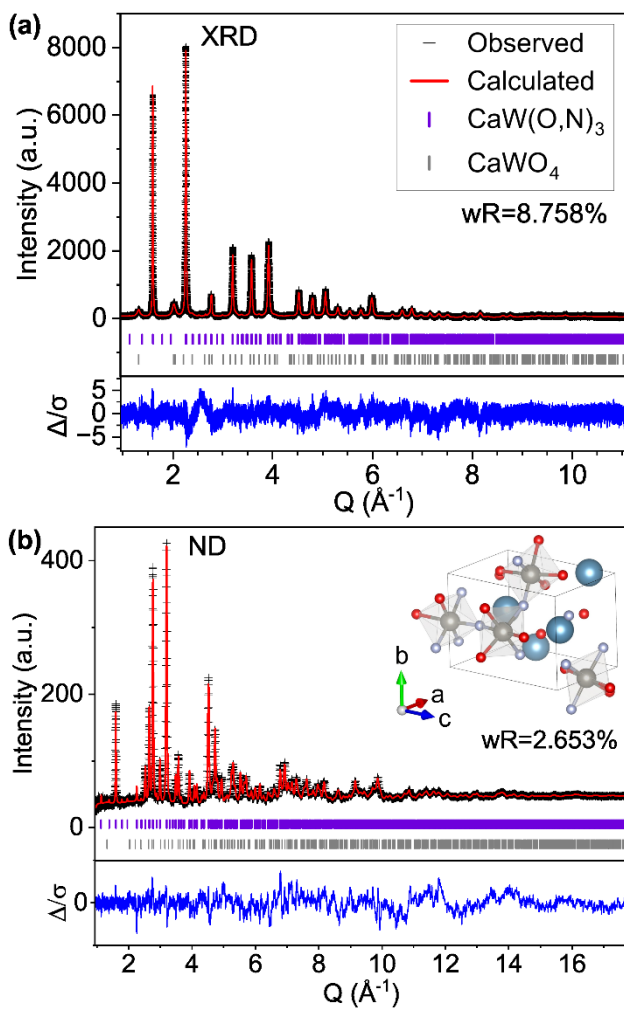

**Fig. S9.** Rietveld refinement of  $\text{CaW}(\text{O},\text{N})_3$  (a) synchrotron XRD and (b) ND patterns to the best fit 20-atom DFT-determined structure with  $P1$  symmetry and disordered anions (model C-VIII, structure F).

**Table S4:** Structural parameters for  $\text{CaW}(\text{O},\text{N})_3$  from Rietveld refinement of diffraction patterns with a 60-atom providing the best fit to diffraction data (model C-IX, structure C). Atomic positions in Table S4.

|                |                                      |             |
|----------------|--------------------------------------|-------------|
| Formula        | CaWO <sub>1.5</sub> N <sub>1.5</sub> |             |
| S.G. #         | 1                                    |             |
| S.G.           | <i>P1</i>                            |             |
| Crystal system | Triclinic                            |             |
| a              | 5.5635(1) Å                          |             |
| b              | 7.87236(15) Å                        |             |
| c              | 16.6013(3) Å                         |             |
| α              | 90.203(5) °                          |             |
| β              | 90.124(2) °                          |             |
| γ              | 89.7797(8) °                         |             |
| Volume         | 727.16(2) Å <sup>3</sup>             |             |
| <b>Type</b>    | <b>Occ.</b>                          | <b>Uiso</b> |
| Ca             | 1                                    | 0.0057(7)   |
| W              | 0.982(2)                             | 0.0145(1)   |
| O              | 1                                    | 0.0023(3)   |
| N              | 0.880(5)                             | 0.0103(4)   |



**Table S5:** Atomic position, occupancy, and atomic displacement parameters for model C-IX.

| Name | x         | y        | z        | Occ.     | Uiso      | Name | x        | y        | z        | Occ.     | Uiso      |
|------|-----------|----------|----------|----------|-----------|------|----------|----------|----------|----------|-----------|
| Ca0  | -0.020(5) | 0.710(4) | 0.319(1) | 1        | 0.0057(7) | N30  | 0.273(5) | 0.513(3) | 0.426(2) | 0.880(5) | 0.0103(4) |
| Ca1  | 0.001(6)  | 0.769(4) | 0.665(2) | 1        | 0.0057(7) | N31  | 0.278(5) | 0.951(3) | 0.435(2) | 0.880(5) | 0.0103(4) |
| Ca2  | -0.004(6) | 0.734(4) | 0.003(2) | 1        | 0.0057(7) | N32  | 0.484(4) | 0.742(3) | 0.315(2) | 0.880(5) | 0.0103(4) |
| Ca3  | 0.487(6)  | 0.251(4) | 0.165(2) | 1        | 0.0057(7) | N33  | 0.493(4) | 0.749(3) | 0.651(1) | 0.880(5) | 0.0103(4) |
| Ca4  | 0.468(6)  | 0.253(4) | 0.836(2) | 1        | 0.0057(7) | N34  | 0.531(5) | 0.261(3) | 0.019(1) | 0.880(5) | 0.0103(4) |
| Ca5  | 0.479(7)  | 0.264(4) | 0.499(2) | 1        | 0.0057(7) | N35  | 0.718(5) | 0.013(3) | 0.577(1) | 0.880(5) | 0.0103(4) |
| Ca6  | 0.524(5)  | 0.781(4) | 0.845(2) | 1        | 0.0057(7) | N36  | 0.726(5) | 0.470(4) | 0.236(2) | 0.880(5) | 0.0103(4) |
| Ca7  | 0.502(6)  | 0.738(4) | 0.167(2) | 1        | 0.0057(7) | N37  | 0.715(5) | 0.019(4) | 0.908(2) | 0.880(5) | 0.0103(4) |
| Ca8  | 0.500(5)  | 0.801(3) | 0.485(1) | 1        | 0.0057(7) | N38  | 0.786(4) | 0.549(3) | 0.736(2) | 0.880(5) | 0.0103(4) |
| Ca9  | 0.989(6)  | 0.246(5) | 0.330(2) | 1        | 0.0057(7) | N39  | 0.784(5) | 0.977(3) | 0.740(2) | 0.880(5) | 0.0103(4) |
| Ca10 | 0.964(6)  | 0.264(4) | 0.665(2) | 1        | 0.0057(7) | N40  | 1.001(5) | 0.759(3) | 0.853(2) | 0.880(5) | 0.0103(4) |
| Ca11 | 0.956(5)  | 0.246(4) | 1.002(2) | 1        | 0.0057(7) | N41  | 0.998(5) | 0.757(3) | 0.186(2) | 0.880(5) | 0.0103(4) |
| W12  | 0.006(3)  | 0.498(2) | 0.168(1) | 0.982(2) | 0.0145(1) | O42  | 0.003(5) | 0.247(3) | 0.143(1) | 1        | 0.0023(3) |
| W11  | -0.006(4) | 0.005(2) | 0.500(1) | 0.982(2) | 0.0145(1) | O43  | 0.035(4) | 0.256(3) | 0.806(1) | 1        | 0.0023(3) |
| W14  | -0.005(3) | 0.990(2) | 0.168(1) | 0.982(2) | 0.0145(1) | O44  | 0.212(5) | 0.463(3) | 0.601(2) | 1        | 0.0023(3) |
| W15  | 0.016(3)  | 0.512(2) | 0.499(1) | 0.982(2) | 0.0145(1) | O45  | 0.201(5) | 0.032(3) | 0.266(2) | 1        | 0.0023(3) |
| W16  | 0.496(4)  | 0.009(2) | 0.999(1) | 0.982(2) | 0.0145(1) | O46  | 0.224(5) | 0.472(3) | 0.930(2) | 1        | 0.0023(3) |
| W17  | 0.499(4)  | 0.501(2) | 0.001(1) | 0.982(2) | 0.0145(1) | O47  | 0.284(5) | 0.541(4) | 0.760(2) | 1        | 0.0023(3) |
| W18  | 0.487(3)  | 0.485(2) | 0.343(1) | 0.982(2) | 0.0145(1) | O48  | 0.282(5) | 0.979(4) | 0.761(2) | 1        | 0.0023(3) |
| W19  | 0.496(4)  | 0.997(2) | 0.338(1) | 0.982(2) | 0.0145(1) | O49  | 0.491(5) | 0.758(3) | 0.980(2) | 1        | 0.0023(3) |
| W20  | 0.499(3)  | 0.514(2) | 0.666(1) | 0.982(2) | 0.0145(1) | O50  | 0.540(5) | 0.266(3) | 0.689(1) | 1        | 0.0023(3) |
| W21  | 0.489(3)  | 0.995(2) | 0.671(1) | 0.982(2) | 0.0145(1) | O51  | 0.505(5) | 0.237(3) | 0.361(1) | 1        | 0.0023(3) |
| W22  | 1.000(3)  | 1.000(3) | 0.834(1) | 0.982(2) | 0.0145(1) | O52  | 0.701(4) | 0.491(3) | 0.570(1) | 1        | 0.0023(3) |
| W23  | 1.008(4)  | 0.510(2) | 0.829(1) | 0.982(2) | 0.0145(1) | O53  | 0.702(4) | 0.033(3) | 0.235(2) | 1        | 0.0023(3) |
| N24  | -0.011(5) | 0.238(3) | 0.487(1) | 0.880(5) | 0.0103(4) | O54  | 0.715(5) | 0.474(3) | 0.903(1) | 1        | 0.0023(3) |
| N25  | 0.221(4)  | 0.030(3) | 0.596(2) | 0.880(5) | 0.0103(4) | O55  | 0.811(4) | 0.957(3) | 0.072(2) | 1        | 0.0023(3) |
| N26  | 0.237(4)  | 0.454(3) | 0.257(1) | 0.880(5) | 0.0103(4) | O56  | 0.795(4) | 0.542(3) | 0.068(2) | 1        | 0.0023(3) |
| N27  | 0.212(5)  | 0.030(4) | 0.933(2) | 0.880(5) | 0.0103(4) | O57  | 0.773(5) | 0.531(3) | 0.407(2) | 1        | 0.0023(3) |
| N28  | 0.339(3)  | 0.993(3) | 0.103(1) | 0.880(5) | 0.0103(4) | O58  | 0.788(5) | 0.965(4) | 0.408(2) | 1        | 0.0023(3) |
| N29  | 0.286(5)  | 0.540(3) | 0.096(2) | 0.880(5) | 0.0103(4) | O59  | 0.999(5) | 0.746(3) | 0.522(2) | 1        | 0.0023(3) |

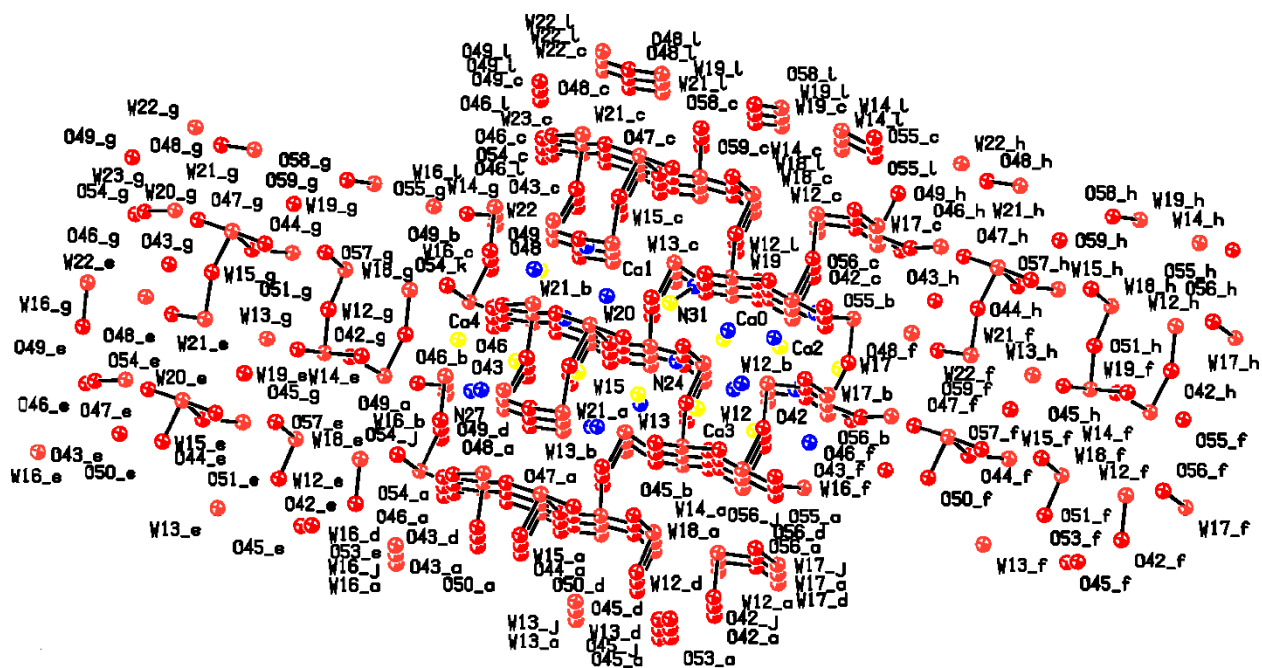

**Fig. S10:** Line drawing of model C-IX with labeled atoms corresponding to atomic positions in Table S4. Image generated from PLATON program.

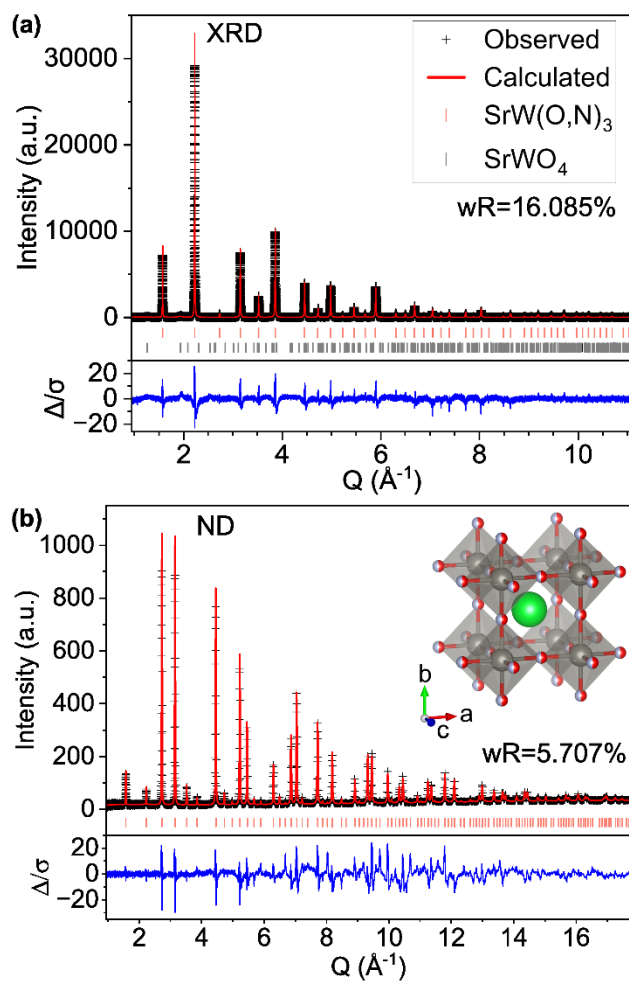

**Fig. S11:** Rietveld refinement of  $\text{SrW}(\text{O},\text{N})_3$  (a) synchrotron XRD and (b) ND patterns to the reported  $Pm\bar{3}m$  structure with disordered anions (model S-I).

**Table S6:** Structural parameters from Rietveld refinement of diffraction patterns with model S-I.

| Formula            |     | SrWO <sub>1.5</sub> N <sub>1.5</sub> |     |      |            |
|--------------------|-----|--------------------------------------|-----|------|------------|
| Space group number |     | 221                                  |     |      |            |
| Space group symbol |     | $Pm\bar{3}m$                         |     |      |            |
| Crystal system     |     | Cubic                                |     |      |            |
| a                  |     | 3.98697(1) Å                         |     |      |            |
| Volume             |     | 63.376(1) Å <sup>3</sup>             |     |      |            |
| Site               | x   | y                                    | z   | Occ. | Uiso       |
| Sr                 | 0.5 | 0.5                                  | 0.5 | 1    | 0.01073(8) |
| W                  | 0   | 0                                    | 0   | 1    | 0.01218(6) |
| O1                 | 0.5 | 0                                    | 0   | 0.5  | 0.00600(3) |
| N1                 | -   | -                                    | -   | 0.5  | -          |

**Table S7:** Unit cell information and lattice parameters for model S-II.

|                |                                      |
|----------------|--------------------------------------|
| Formula        | SrWO <sub>1.5</sub> N <sub>1.5</sub> |
| S.G. #         | 1                                    |
| S.G.           | <i>P1</i>                            |
| Crystal system | Triclinic                            |
| a              | 5.64456(6) Å                         |
| b              | 7.97340(7) Å                         |
| c              | 11.26568(8) Å                        |
| α              | 90.019(2) °                          |
| β              | 90.1053(6) °                         |
| γ              | 89.9492(7) °                         |
| Volume         | 507.025(4) Å <sup>3</sup>            |

**Table S8:** Atomic position, occupancy, and atomic displacement parameters for model S-II.

| Site | x         | y        | z        | Occ.     | Uiso      |
|------|-----------|----------|----------|----------|-----------|
| N1   | 0.747(9)  | 0.751(7) | 0.121(4) | 0.956(1) | 0.0060(4) |
| N2   | 0.249(7)  | 0.25(1)  | 0.127(3) | 0.956(1) | 0.0060(4) |
| N3   | 0.753(7)  | 0.257(8) | 0.122(3) | 0.956(1) | 0.0060(4) |
| N4   | 1.005(6)  | 0.504(8) | 0.256(4) | 0.956(1) | 0.0060(4) |
| N5   | 0.731(5)  | 0.755(7) | 0.367(3) | 0.956(1) | 0.0060(4) |
| N6   | 0.246(7)  | 0.756(8) | 0.378(4) | 0.956(1) | 0.0060(4) |
| N7   | 0.747(7)  | 0.257(9) | 0.376(3) | 0.956(1) | 0.0060(4) |
| N8   | 0.502(8)  | 0.51(1)  | 0.504(3) | 0.956(1) | 0.0060(4) |
| N9   | 0.504(7)  | 0.01(1)  | 0.505(3) | 0.956(1) | 0.0060(4) |
| N10  | 0.248(7)  | 0.753(8) | 0.628(3) | 0.956(1) | 0.0060(4) |
| N11  | -0.006(8) | 1.00(1)  | 0.748(4) | 0.956(1) | 0.0060(4) |
| N12  | 0.248(7)  | 0.259(7) | 0.873(4) | 0.956(1) | 0.0060(4) |
| O13  | 0.24(1)   | 0.76(1)  | 0.120(5) | 0.967(5) | 0.0058(8) |
| O14  | -0.01(1)  | -0.01(1) | 0.253(7) | 0.967(5) | 0.0058(8) |
| O15  | 0.25(1)   | 0.25(1)  | 0.377(6) | 0.967(5) | 0.0058(8) |
| O16  | 0.254(9)  | 0.26(1)  | 0.630(5) | 0.967(5) | 0.0058(8) |
| O17  | 0.75(1)   | 0.75(1)  | 0.621(5) | 0.967(5) | 0.0058(8) |
| O18  | 0.75(1)   | 0.25(1)  | 0.622(5) | 0.967(5) | 0.0058(8) |
| O19  | 0.99(1)   | 0.51(2)  | 0.751(6) | 0.967(5) | 0.0058(8) |
| O20  | 0.74(1)   | 0.75(1)  | 0.871(5) | 0.967(5) | 0.0058(8) |
| O21  | 0.74(1)   | 0.26(1)  | 0.866(5) | 0.967(5) | 0.0058(8) |
| O22  | 0.241(9)  | 0.751(9) | 0.868(5) | 0.967(5) | 0.0058(8) |
| O23  | 0.497(9)  | 1.01(1)  | 0.994(5) | 0.967(5) | 0.0058(8) |
| O24  | 0.505(8)  | 0.51(1)  | 1.006(4) | 0.967(5) | 0.0058(8) |
| Sr25 | -0.005(9) | 1.00(1)  | 0.002(4) | 0.977(1) | 0.0106(4) |
| Sr26 | 0.50(1)   | 0.50(1)  | 0.249(6) | 0.977(1) | 0.0106(4) |
| Sr27 | 0.50(1)   | 0.00(1)  | 0.250(6) | 0.977(1) | 0.0106(4) |
| Sr28 | 0.001(8)  | 0.01(1)  | 0.497(4) | 0.977(1) | 0.0106(4) |
| Sr29 | -0.006(8) | 0.51(1)  | 0.501(4) | 0.977(1) | 0.0106(4) |
| Sr30 | 0.505(9)  | 0.51(1)  | 0.751(6) | 0.977(1) | 0.0106(4) |
| Sr31 | 0.496(9)  | 0.01(1)  | 0.755(5) | 0.977(1) | 0.0106(4) |
| Sr32 | -0.009(9) | 0.51(1)  | 0.998(4) | 0.977(1) | 0.0106(4) |
| W33  | 0.488(4)  | 0.754(7) | 0.002(3) | 1        | 0.0137(1) |
| W34  | 0.494(4)  | 0.254(8) | 0.001(3) | 1        | 0.0137(1) |
| W35  | 1.001(4)  | 0.259(5) | 0.248(3) | 1        | 0.0137(1) |
| W36  | 1.000(4)  | 0.756(6) | 0.250(3) | 1        | 0.0137(1) |
| W37  | 0.494(4)  | 0.756(7) | 0.501(3) | 1        | 0.0137(1) |
| W38  | 0.497(4)  | 0.256(7) | 0.499(3) | 1        | 0.0137(1) |
| W39  | 0.003(4)  | 0.759(5) | 0.749(3) | 1        | 0.0137(1) |
| W40  | -0.007(4) | 0.253(5) | 0.751(3) | 1        | 0.0137(1) |

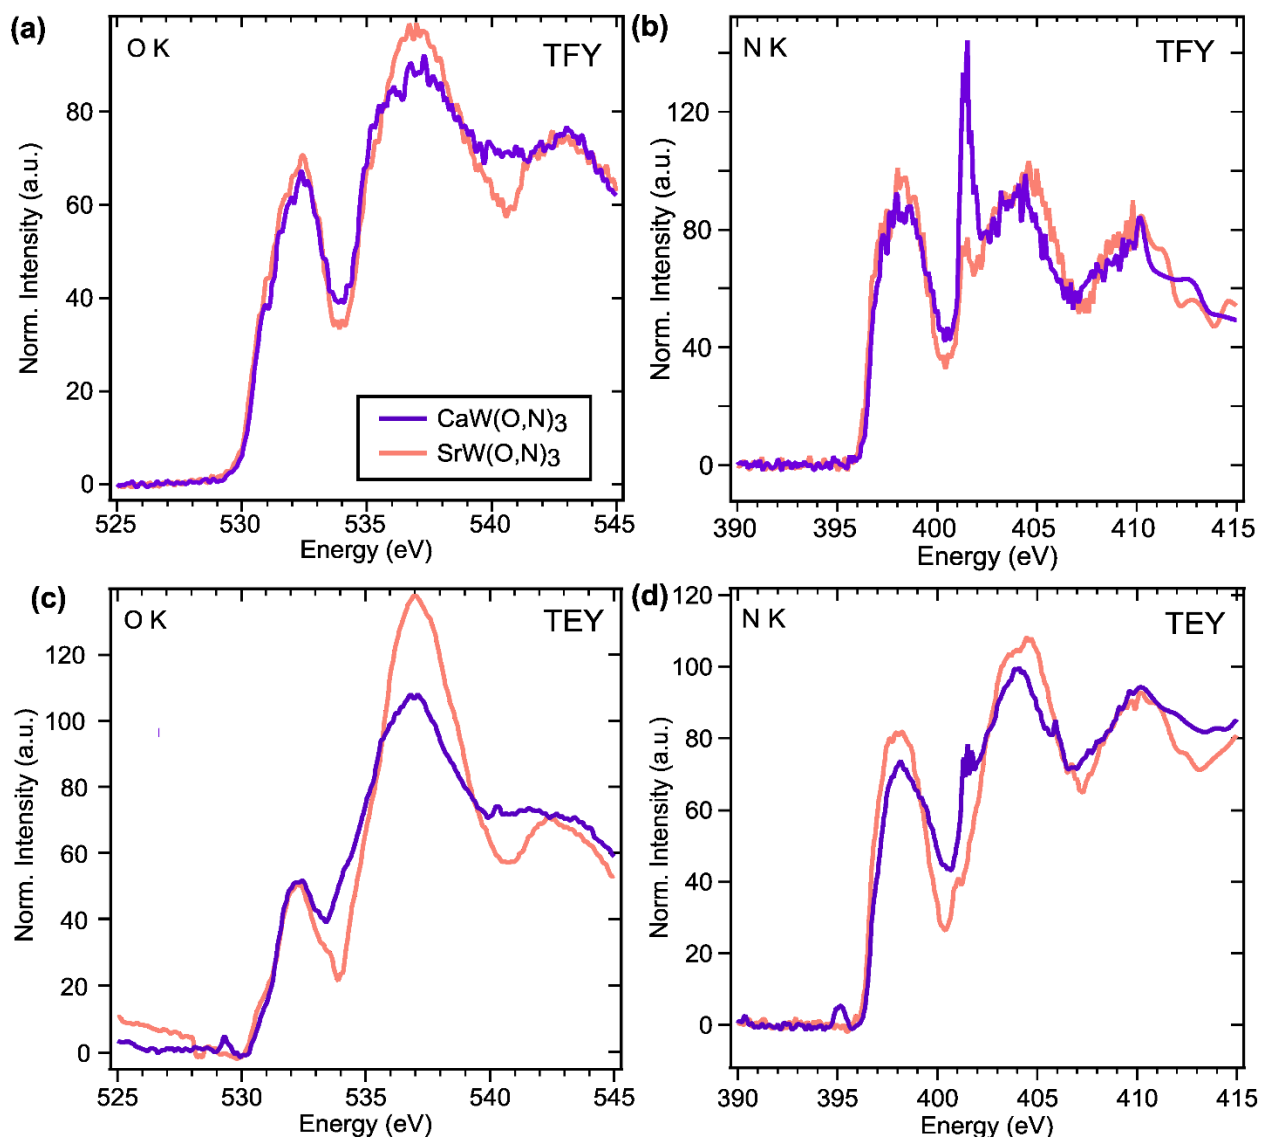

**Fig. S12:** X-ray absorption spectra of  $\text{CaW}(\text{O,N})_3$  and  $\text{SrW}(\text{O,N})_3$  at the O and N K-edges measured using total fluorescence yield (TFY) and total electron yield (TEY). (a) O K-edge TFY, (b) N K-edge TFY, (c) O K-edge TEY, (d) N K-edge TEY. Intensities are area-normalized between 528–545 eV for O K-edge and 394–410 eV for N K-edge.

## References

1. B. P. Payne, M. C. Biesinger and N. S. McIntyre, *Journal of Electron Spectroscopy and Related Phenomena*, 2011, **184**, 29-37.
2. S. P. Culver, M. J. Greaney, A. Tinoco and R. L. Brutchey, *Dalton Transactions*, 2015, **44**, 15042-15048.
3. R. M. Hazen, L. W. Finger and J. W. E. Mariathasan, *Journal of Physics and Chemistry of Solids*, 1985, **46**, 253-263.
